# Supplementary material for: Comprehensive Genomic Investigation of Coevolution of mcr genes in Escherichia coli Strains via Nanopore Sequencing
Source: PubMed Central journal article supplement (PMC7933819; doi:10.1002/gch2.202000014), 2021-01-12
Supplement: GCH2-5-2000014-s001.pdf [file GCH2-5-2000014-s001.pdf]

## Supporting Information

for *Global Challenges*, DOI: 10.1002/gch2.202000014

Comprehensive Genomic Investigation of Coevolution of *mcr*  
genes in *Escherichia coli* Strains via Nanopore Sequencing

*Ruichao Li, Pengcheng Du, Pei Zhang, Yan Li, Xiaorong  
Yang, Zhiqiang Wang, Juan Wang, and Li Bai\**

## Supplementary Data

### Comprehensive genomic investigation of coevolution of *mcr* genes in *E. coli* strains via nanopore sequencing

Ruichao Li<sup>1,2†</sup>, Pengcheng Du<sup>3†</sup>, Pei Zhang<sup>4</sup>, Yan Li<sup>1</sup>, Xiaorong Yang<sup>5</sup>, Zhiqiang Wang<sup>1</sup>, Juan Wang<sup>6</sup>, Li Bai<sup>4\*</sup>

<sup>1</sup> Jiangsu Co-Innovation Center for Prevention and Control of Important Animal Infectious Diseases and Zoonoses, College of Veterinary Medicine, Yangzhou University, Yangzhou, Jiangsu, P. R. China;

<sup>2</sup> Institute of Comparative Medicine, Yangzhou University, Yangzhou, Jiangsu, P. R. China;

<sup>3</sup> Institute of Infectious Diseases, Beijing Ditan Hospital, Capital Medical University, and Beijing Key Laboratory of Emerging Infectious Diseases, Beijing, P. R. China;

<sup>4</sup> Key Laboratory of Food Safety Risk Assessment, National Health Commission of the People's Republic of China, China National Center for Food Safety Risk Assessment, Beijing, P. R. China;

<sup>5</sup> Center for Disease Control and Prevention of Sichuan Province, Chengdu, Sichuan, P. R. China;

<sup>6</sup> College of Veterinary Medicine, Northwest A&F University, Yangling, Shaanxi, P. R. China.

**Running title:** Characterization of bacterial populations harboring *mcr-1* and *mcr-3* genes

†Contributed equally to the work

\*Corresponding author: Li Bai, Tel: 8610-52165543; Email: baili@cfsa.net.cn

China National Center for Food Safety Risk Assessment, Beijing, China

**Key words:** colistin resistance, plasmids, *mcr* genes, coevolution

|

**Table S1. Antimicrobial susceptibility testing of different *E. coli* strains and their transconjugants against different drugs (MICs, µg/mL).**

| Strains <sup>a</sup> | Antimicrobials <sup>b</sup> |      |       |     |     |     |     |     |     |     |       |            |     |     |    |
|----------------------|-----------------------------|------|-------|-----|-----|-----|-----|-----|-----|-----|-------|------------|-----|-----|----|
|                      | CTX                         | CAZ  | IMP   | TET | CFZ | CFX | GEN | AMP | AMS | CHL | CIP   | SXT        | NAL | AZI | CT |
| CP8-3                | ≤0.25                       | ≤1   | ≤0.25 | >32 | 2   | 8   | >32 | >64 | 8   | >64 | 1     | >8/152     | 16  | 16  | 8  |
| CP8-3-T              | ≤0.25                       | ≤0.5 | ≤0.25 | 32  | 4   | 8   | 32  | >64 | 8/4 | >64 | 0.5   | ≤0.25/4.75 | 16  | ≤2  | 4  |
| CP55                 | ≤0.25                       | ≤0.5 | ≤0.25 | >32 | 4   | 8   | 16  | >64 | 8/4 | >64 | 0.25  | ≤0.25/4.75 | 8   | ≤2  | 8  |
| CP55-T1              | ≤0.25                       | ≤0.5 | ≤0.25 | 4   | 4   | 16  | ≤1  | 8   | 8/4 | 8   | ≤0.03 | ≤0.25/4.75 | ≤4  | ≤2  | 4  |
| CP55-T2              | ≤0.25                       | ≤0.5 | ≤0.25 | 4   | 2   | 4   | ≤1  | 4   | 4/2 | 8   | ≤0.03 | ≤0.25/4.75 | ≤4  | 4   | 4  |
| CP61                 | ≤0.25                       | ≤1   | ≤0.25 | >32 | 4   | 8   | >32 | >64 | 8   | >64 | 0.5   | >8/152     | 8   | 8   | 4  |
| CP66-6               | 0.5                         | ≤1   | 1     | >32 | 16  | 32  | >32 | >64 | >64 | >64 | 32    | >8/152     | >64 | >64 | 8  |
| CP131                | ≤0.25                       | ≤1   | ≤0.25 | >32 | 8   | 16  | >32 | >64 | 16  | >64 | 2     | >8/152     | >64 | 16  | 4  |

<sup>a</sup> The strains with the letter T were the corresponding transconjugants with *E. coli* J53 as the recipient strain.

<sup>b</sup> Drugs abbreviations: CTX, cefotaxime; CAZ, ceftazidime; IMP, imipenem; TET, tetracycline; CFZ, cefazolin; CFX, cefoxitin; GEN, gentamycin; AMP, ampicillin; AMS, ampicillin/sulbactam; CHL, chloramphenicol; CIP, ciprofloxacin; SXT, trimethoprim/sulfamethoxazole; NAL, nalidixic acid; AZI, azithromycin; CT, colistin.

**Table S2. Distribution of resistance genes, insertion sequences and replicon genes among the five *E. coli* genomes positive for *mcr-1* and *mcr-3* genes.**

|                         | CP131  | CP55   | CP61   | CP66-6 | CP8-3  |
|-------------------------|--------|--------|--------|--------|--------|
| Col(MG828)_1__NC_008486 | 0      | 91.603 | 0      | 0      | 0      |
| Col(Ye4449)_1__FJ696405 | 0      | 0      | 0      | 0      | 81.026 |
| Col156_1__NC_009781     | 0      | 98.026 | 0      | 0      | 0      |
| ColKP3_1__JN205800      | 0      | 0      | 0      | 100    | 0      |
| ColRNAL_1__DQ298019     | 0      | 89.256 | 0      | 0      | 0      |
| IS1006                  | 0      | 0      | 0      | 99.878 | 0      |
| IS102                   | 0      | 0      | 94.896 | 0      | 0      |
| IS1203                  | 0      | 95.42  | 0      | 95.42  | 0      |
| IS1294                  | 0      | 0      | 0      | 99.763 | 99.763 |
| IS150                   | 99.861 | 0      | 99.792 | 0      | 99.861 |
| IS15DI                  | 0      | 99.146 | 0      | 0      | 99.512 |
| IS15DIV                 | 0      | 100    | 0      | 0      | 0      |
| IS186B                  | 99.925 | 99.925 | 99.925 | 0      | 99.925 |
| IS1A                    | 90.625 | 0      | 90.625 | 0      | 98.958 |
| IS1F                    | 0      | 96.597 | 0      | 0      | 0      |
| IS1H                    | 0      | 98.56  | 0      | 98.429 | 0      |
| IS1R                    | 94.01  | 99.219 | 0      | 90.625 | 0      |
| IS1SD                   | 0      | 0      | 98.827 | 98.564 | 98.957 |
| IS1X2                   | 0      | 0      | 0      | 0      | 97.786 |
| IS2                     | 95.642 | 96.093 | 95.672 | 95.492 | 0      |
| IS200                   | 0      | 89.255 | 0      | 0      | 0      |
| IS200C                  | 0      | 0      | 0      | 99.577 | 0      |
| IS26                    | 99.878 | 0      | 99.634 | 100    | 99.616 |
| IS3                     | 99.921 | 99.921 | 99.921 | 99.921 | 0      |
| IS30                    | 99.836 | 99.836 | 99.918 | 99.545 | 99.836 |
| IS3000                  | 0      | 0      | 0      | 99.866 | 0      |
| IS4321R                 | 0      | 99.548 | 0      | 0      | 0      |
| IS5                     | 0      | 0      | 0      | 0      | 0      |
| IS5075                  | 0      | 99.623 | 0      | 0      | 0      |
| IS609                   | 0      | 97.597 | 97.426 | 97.654 | 97.712 |
| IS6100                  | 0      | 0      | 0      | 100    | 0      |
| IS621                   | 0      | 99.923 | 0      | 99.845 | 0      |
| IS629                   | 99.542 | 97.786 | 0      | 0      | 99.466 |
| IS903B                  | 95.845 | 0      | 98.297 | 89.225 | 96.975 |

|                                    |        |        |        |        |        |
|------------------------------------|--------|--------|--------|--------|--------|
| IS911                              | 94.052 | 0      | 0      | 0      | 0      |
| ISAbal                             | 0      | 0      | 0      | 0      | 0      |
| ISAp11                             | 99.907 | 0      | 99.907 | 99.907 | 99.907 |
| ISCro1                             | 98.111 | 0      | 0      | 0      | 0      |
| ISCro3                             | 0      | 0      | 0      | 90.756 | 0      |
| ISEc1                              | 0      | 96.897 | 96.406 | 96.664 | 95.279 |
| ISEc12                             | 99.961 | 0      | 0      | 0      | 0      |
| ISEc17                             | 0      | 0      | 0      | 0      | 99.921 |
| ISEc23                             | 0      | 96.327 | 0      | 0      | 0      |
| ISEc26                             | 0      | 98.677 | 98.511 | 98.677 | 0      |
| ISEc31                             | 0      | 92.732 | 0      | 0      | 0      |
| ISEc32                             | 0      | 100    | 0      | 0      | 0      |
| ISEc39                             | 0      | 99.62  | 0      | 0      | 0      |
| ISEc5                              | 90.495 | 0      | 0      | 0      | 0      |
| ISEc8                              | 0      | 99.14  | 85.003 | 0      | 85.003 |
| ISersp1                            | 0      | 88.436 | 0      | 0      | 0      |
| ISKpn26                            | 96.739 | 0      | 0      | 0      | 99.582 |
| ISSso1                             | 0      | 87.215 | 0      | 0      | 0      |
| ISSty2                             | 0      | 0      | 81.445 | 0      | 0      |
| ISSwi1                             | 0      | 0      | 0      | 0      | 0      |
| ISVsa3                             | 0      | 0      | 0      | 100    | 0      |
| ISVsa5                             | 0      | 0      | 98.947 | 99.925 | 0      |
| IncB/O/K/Z_2_GU25664<br>1          | 0      | 95.484 | 0      | 0      | 0      |
| IncFIA(HI1)_1_HI1_AF<br>250878     | 0      | 0      | 98.711 | 0      | 98.711 |
| IncFIB(AP001918)_1__<br>AP001918   | 98.827 | 98.507 | 0      | 97.678 | 0      |
| IncFIB(K)_1_Kpn3_JN2<br>33704      | 0      | 0      | 98.929 | 0      | 98.929 |
| IncFIB(pHCM2)_1_pHC<br>M2_AL513384 | 0      | 0      | 0      | 0      | 0      |
| IncFIC(FII)_1__AP0019<br>18        | 94.188 | 0      | 0      | 94     | 0      |
| IncFII(pSE11)_1_pSE11<br>_AP009242 | 0      | 94.34  | 0      | 0      | 0      |
| IncFII_1__AY458016                 | 0      | 100    | 0      | 100    | 100    |
| IncHIIA_1__AF250878                | 0      | 0      | 0      | 0      | 0      |
| IncHII B(R27)_1_R27_A<br>F250878   | 0      | 0      | 0      | 0      | 0      |
| IncN_1__AY046276                   | 0      | 0      | 100    | 0      | 100    |
| IncQ1_1__HE654726                  | 0      | 0      | 0      | 96.222 | 100    |
| IncR_1__DQ449578                   | 0      | 0      | 100    | 0      | 100    |

|                           |        |        |        |        |        |
|---------------------------|--------|--------|--------|--------|--------|
| IncX1_1__EU370913         | 0      | 0      | 98.663 | 0      | 98.93  |
| IncX3_1__JN247852         | 0      | 0      | 0      | 100    | 0      |
| IncX4_1__CP002895         | 0      | 100    | 0      | 0      | 0      |
| IncY_1__K02380            | 0      | 0      | 0      | 0      | 0      |
| QnrS1_1_AB187515          | 0      | 100    | 0      | 100    | 100    |
| QnrS2_1_JF261185          | 0      | 0      | 100    | 0      | 0      |
| aac(3)-IId_1_EU022314     | 0      | 99.884 | 0      | 99.884 | 0      |
| aac(3)-VIa_1_M88012       | 0      | 0      | 99.778 | 0      | 99.778 |
| aadA1_1_X02340            | 0      | 0      | 89.5   | 89.5   | 89.625 |
| aadA2_2_JQ364967          | 100    | 0      | 0      | 0      | 0      |
| aph(3')-Ia_1_V00359       | 0      | 0      | 100    | 100    | 0      |
| blaOXA-181_1_HM9929<br>46 | 0      | 0      | 0      | 100    | 0      |
| blaTEM-1B_1_JF910132      | 100    | 100    | 100    | 99.884 | 100    |
| catA1_1_V00622            | 0      | 99.848 | 0      | 0      | 0      |
| cmlA1_1_M64556            | 0      | 0      | 99.921 | 99.921 | 99.841 |
| dfrA12_1_AB571791         | 100    | 0      | 100    | 100    | 100    |
| erm(B)_18_X66468          | 0      | 0      | 0      | 0      | 0      |
| floR_2_AF118107           | 98.188 | 98.188 | 98.188 | 98.105 | 98.188 |
| fosA_14_AB522970          | 0      | 0      | 0      | 91.367 | 0      |
| lnu(F)_1_EU118119         | 0      | 0      | 0      | 100    | 0      |
| mcr-1_1_KP347127          | 100    | 100    | 100    | 100    | 100    |
| mcr3_NG_055505            | 0      | 99.831 | 100    | 99.831 | 99.831 |
| mef(B)_1_FJ196385         | 0      | 0      | 100    | 0      | 100    |
| mph(A)_2_U36578           | 99.675 | 99.636 | 0      | 99.566 | 0      |
| strA_4_AF321551           | 0      | 99.876 | 0      | 0      | 0      |
| strB_1_M96392             | 0      | 99.881 | 0      | 0      | 0      |
| sul2_2_GQ421466           | 0      | 100    | 0      | 100    | 0      |
| sul3_2_AJ459418           | 100    | 0      | 100    | 100    | 100    |
| tet(A)_4_AJ517790         | 99.917 | 100    | 99.917 | 99.917 | 99.917 |
| tet(M)_4_X75073           | 0      | 0      | 0      | 0      | 99.896 |
| tet(M)_8_X04388           | 96.146 | 0      | 96.146 | 96.146 | 96.146 |

**Table S3. Genetic characterization of *mcr-1* and *mcr-3* genes among the five strains in this study.**

| Strains | <i>mcr-1</i> location | <i>mcr-1</i> structures | <i>mcr-3</i> genes | <i>mcr-3</i> location | <i>mcr-3</i> structures |
|---------|-----------------------|-------------------------|--------------------|-----------------------|-------------------------|
|---------|-----------------------|-------------------------|--------------------|-----------------------|-------------------------|

---

|        |               |                                           |                |                |                                                     |
|--------|---------------|-------------------------------------------|----------------|----------------|-----------------------------------------------------|
| CP8-3  | chromosome    | <i>ISAp11-mcr-1-Δpap2-IS1294- ISAp11</i>  | <i>mcr-3.5</i> | IncR plasmid   | <i>qnrS1-ISKpn19-TnAs2-mcr-3.5-dgkA-IS15-TnAs2</i>  |
| CP55   | IncX4 plasmid | <i>mcr-1-pap2</i>                         | <i>mcr-3.5</i> | IncFII plasmid | <i>IS4321R-TnAs2-mcr-3.5-dgkA-IS15</i>              |
| CP61   | chromosome    | <i>ISAp11- mcr-1- pap2- ISAp11</i>        | <i>mcr-3.1</i> | IncFIB plasmid | <i>ISEc78-TnAs2-mcr-3.1-dgkA-ISKpn40</i>            |
| CP66-6 | chromosome    | <i>ISAp11- mcr-1-Δpap2-IS1294- ISAp11</i> | <i>mcr-3.5</i> | IncFII plasmid | <i>bla<sub>TEM-1B</sub>-TnAs2-mcr-3.5-dgkA-IS26</i> |
| CP131  | chromosome    | <i>ISAp11- mcr-1- pap2- ISAp11</i>        | <i>mcr-3.1</i> | IncFIB plasmid | <i>aac(3)-IId-IS1R-TnAs2-mcr-3.1-dgkA-ISKpn40</i>   |

---



**Table S4. The ratios of subclones losing *mcr-1* or/and *mcr-3* genes among the five *E. coli* strains during bacterial passages last for 28 days.** P denotes the serial cultural passage day (1, 7, 14, 21 and 28). The denominators represent the average total colony numbers in the agar plates, and the numerators for the numbers of colonies losing the *mcr* genes confirmed by PCR. All the ratios in red show the passaged cultures with colonies losing *mcr* genes.

| Strains | Loss of <i>mcr-1</i> without colistin |                   |                    |                    |                    | Loss of <i>mcr-3</i> without colistin |                   |                    |                    |                    |
|---------|---------------------------------------|-------------------|--------------------|--------------------|--------------------|---------------------------------------|-------------------|--------------------|--------------------|--------------------|
|         | Clone_1<br>oss_P1                     | Clone_los<br>s_P7 | Clone_loss<br>_P14 | Clone_loss<br>_P21 | Clone_loss<br>_P28 | Clone_los<br>s_P1                     | Clone_los<br>s_P7 | Clone_loss<br>_P14 | Clone_loss<br>_P21 | Clone_loss<br>_P28 |
| CP8-3   | 0/158                                 | 0/210             | 0/146              | 24/114             | 28/159             | 4/158                                 | 0/210             | 0/146              | 0/114              | 0/159              |
| CP55    | 0/123                                 | 0/201             | 0/133              | 0/152              | 0/78               | 4/123                                 | 0/201             | 16/133             | 20/152             | 4/78               |
| CP61    | 0/92                                  | 0/131             | 8/77               | 4/48               | 12/80              | 8/92                                  | 0/131             | 24/77              | 44/48              | 48/80              |
| CP66-6  | 0/120                                 | 20/211            | 20/167             | 28/114             | 40/210             | 0/120                                 | 32/211            | 48/167             | 48/114             | 48/210             |
| CP131   | 0/83                                  | 0/101             | 0/196              | 4/112              | 0/105              | 0/83                                  | 0/101             | 0/196              | 0/112              | 4/105              |
|         |                                       |                   |                    |                    |                    |                                       |                   |                    |                    |                    |
| Strains | Loss of <i>mcr-1</i> with colistin    |                   |                    |                    |                    | Loss of <i>mcr-3</i> with colistin    |                   |                    |                    |                    |
|         | Clone_1<br>oss_P1                     | Clone_los<br>s_P7 | Clone_loss<br>_P14 | Clone_loss<br>_P21 | Clone_loss<br>_P28 | Clone_los<br>s_P1                     | Clone_los<br>s_P7 | Clone_loss<br>_P14 | Clone_loss<br>_P21 | Clone_loss<br>_P28 |
| CP8-3   | 0/138                                 | 0/220             | 0/200              | 0/150              | 0/131              | 0/138                                 | 0/220             | 0/200              | 0/150              | 0/131              |
| CP55    | 0/64                                  | 0/248             | 0/83               | 0/109              | 0/102              | 0/64                                  | 0/248             | 0/83               | 0/109              | 0/102              |
| CP61    | 0/148                                 | 0/138             | 0/105              | 0/60               | 0/61               | 4/148                                 | 0/138             | 0/105              | 0/60               | 4/80               |
| CP66-6  | 0/100                                 | 0/168             | 0/142              | 0/75               | 0/45               | 0/100                                 | 8/168             | 44/142             | 40/75              | 45/45              |
| CP131   | 0/45                                  | 0/112             | 0/65               | 0/52               | 12/50              | 0/45                                  | 0/112             | 0/65               | 0/52               | 0/50               |

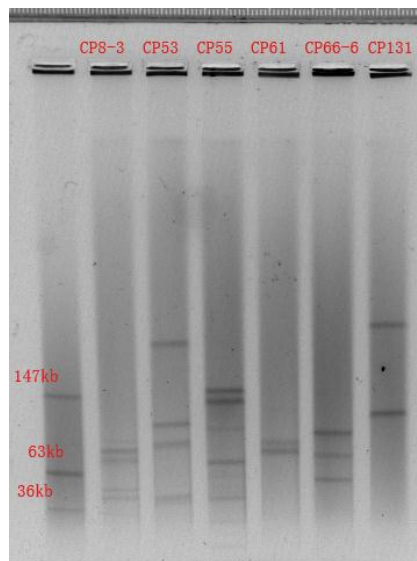

**Figure S1. S1-PFGE of the original five *mcr*-bearing *E. coli* strains.** The first lane indicates the plasmid weight markers (S1-nuclease digested 39R). CP53 was not included in this study.

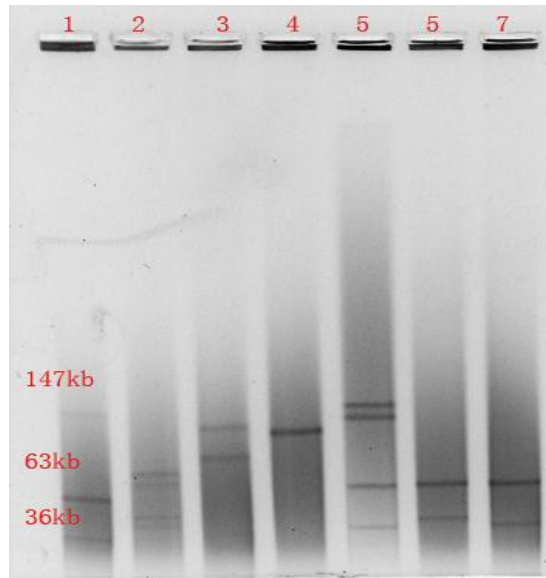

**Figure S2.** S1-PFGE of two *mcr*-bearing *E. coli* strains CP8-3 and CP55, and their transconjugants. Lane1: S1-nuclease digested 39R as a molecular weight marker; Lanes2: CP8-3 (donor), Lanes3: CP8-3-T (transconjugant), Lane5: CP55 (donor), Lane6: CP55-T1 (transconjugant), Lane7: CP55-T2 (transconjugant).

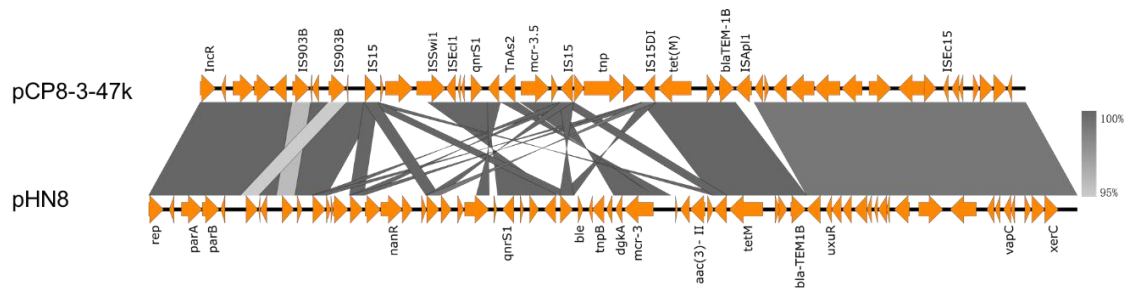

**Figure S3.** Linear alignment of two IncR *mcr*-3-bearing plasmids with similar backbone structures.



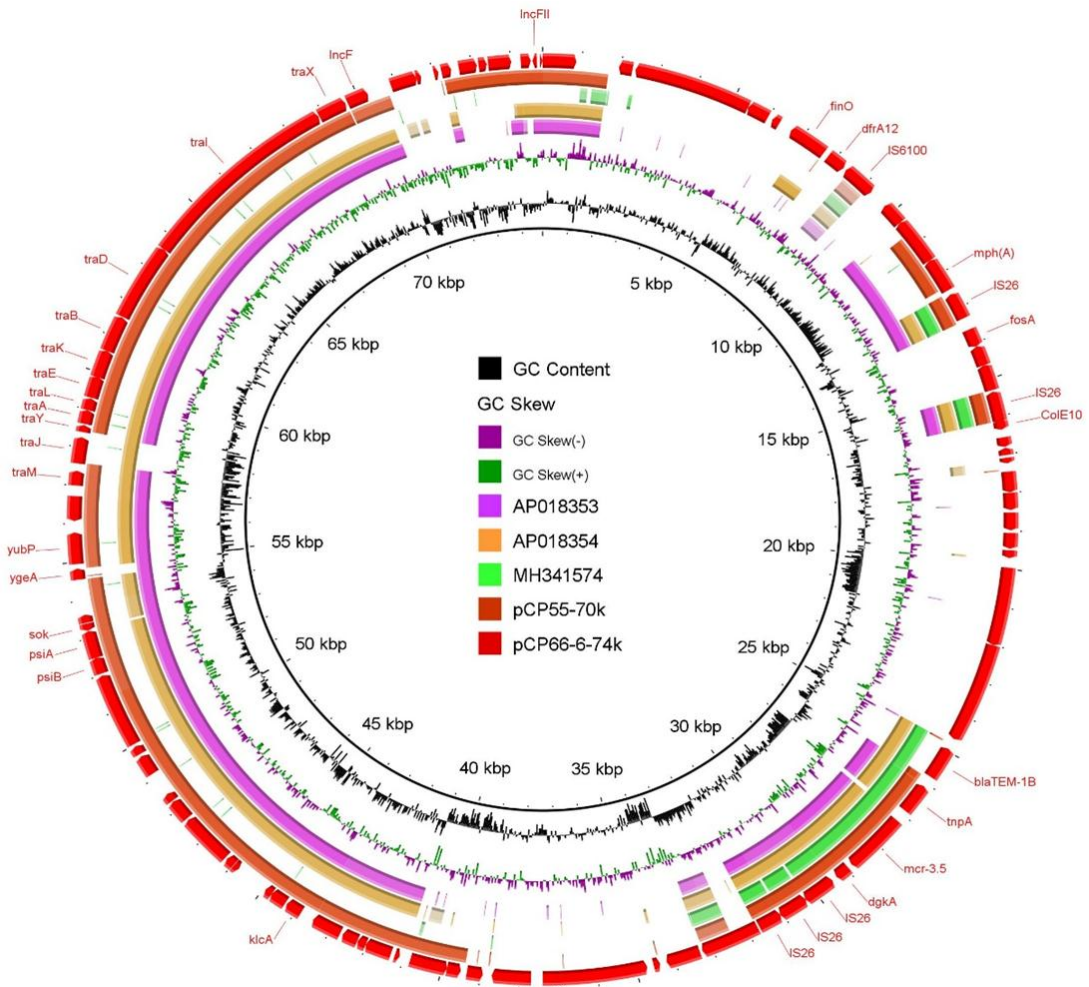

**Figure S5. Circular alignment of *mcr-3.5*-bearing plasmid pCP66-6-74kb with other similar plasmids in this study and NCBI database.**
